# Supplementary material for: Heparanase potentiates the invasion and migration of pancreatic cancer cells via epithelial-to-mesenchymal transition through the Wnt/β-catenin pathway
Source: PubMed Central journal article supplement — Oncol Rep. 2020 Jun 10;44(2):711–21. doi: 10.3892/or.2020.7641 (PMC7336506; doi:10.3892/or.2020.7641), 2020-06-10

Figure S1. Protein and mRNA expression levels of HPSE in (A and C) PANC-1 and (B and D) BxPC-3 cells after sh-NC or sh-HPSE transfection. HPSE, heparanase. \* $P < 0.05$  vs. sh-NC group, \*\* $P < 0.01$  vs. sh-HPSE group.

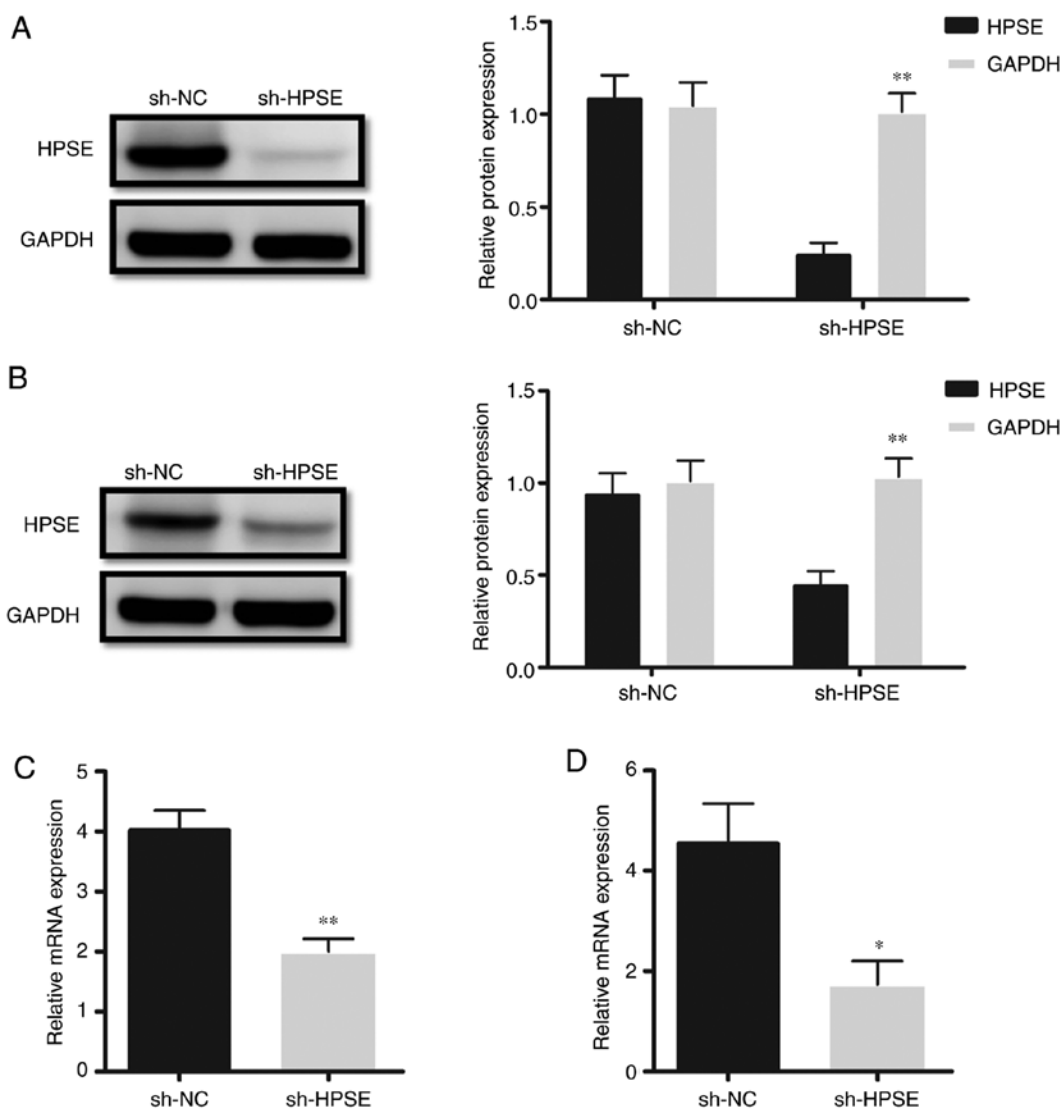

Figure S2. The protein (A) and mRNA (B) expression levels in sh-HPSE and  $\beta$ -catenin/sh-HPSE PANC-1 cell line. HPSE, heparanase. \*\* $P < 0.01$  vs.  $\beta$ -catenin/sh-HPSE group, \*\*\* $P < 0.01$  vs.  $\beta$ -catenin/sh-HPSE group.

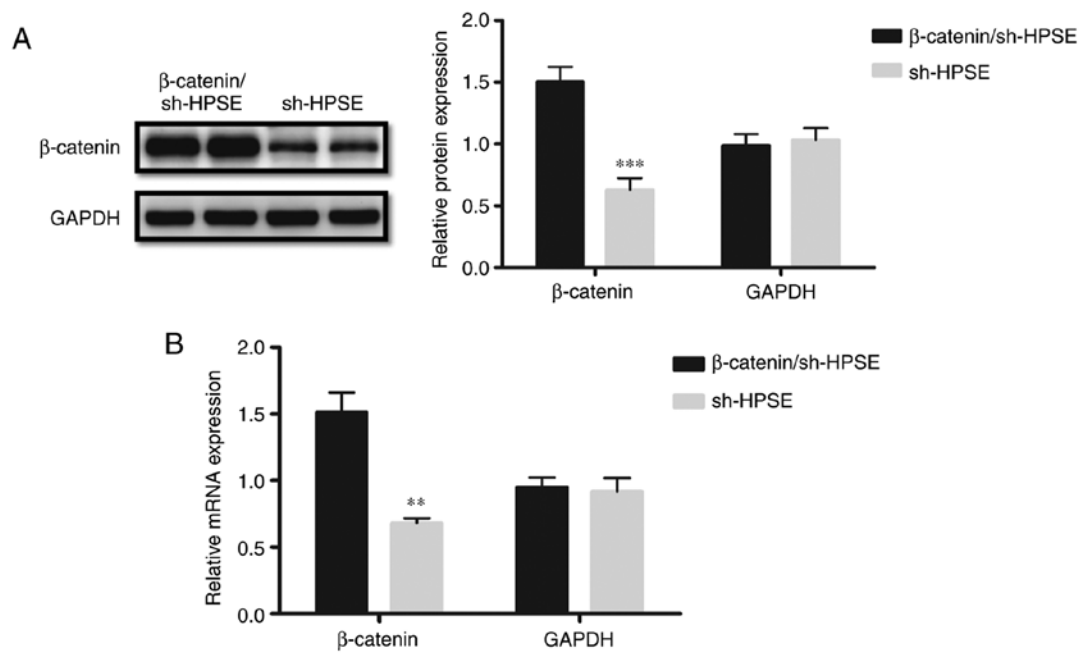

Supplement: Supplementary_Data.pdf [file Supplementary_Data.pdf]
